# Supplementary material for: Functional expression of Tim-3 on blasts and clinical impact of its ligand galectin-9 in myelodysplastic syndromes
Source: PubMed Central journal article supplement (PMC5687656; doi:10.18632/oncotarget.21492), 2017-10-04
Supplement: oncotarget-08-88904-s001.pdf [file oncotarget-08-88904-s001.pdf]

# Functional expression of Tim-3 on blasts and clinical impact of its ligand galectin-9 in myelodysplastic syndromes

## SUPPLEMENTARY MATERIALS

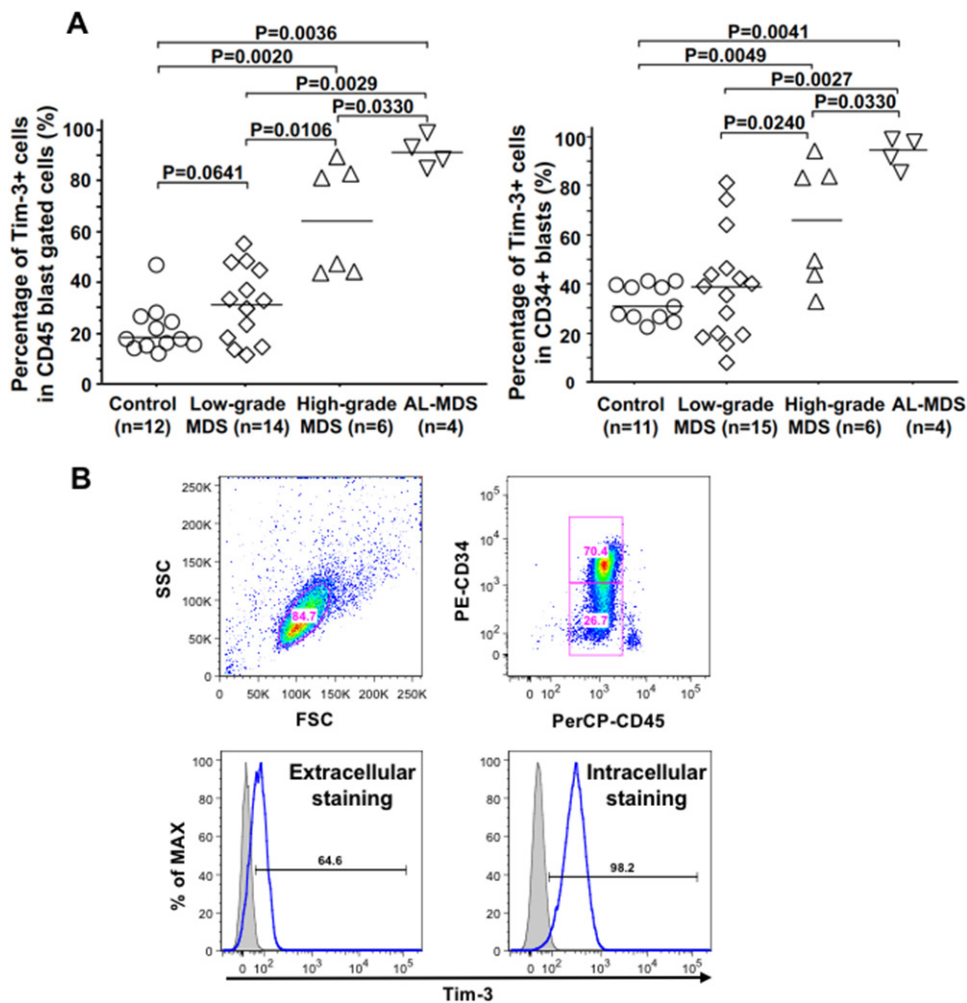

**Supplementary Figure 1: Tim-3 expression on blasts obtained from patients with MDS and MDS/AL.** (A) Comparison of cell surface Tim-3 expression on blasts, which were gated by CD45/side-scatter (left) and CD34/CD45 (right) gating, with those from normal controls and patients with MDS and AL-MDS. (B) Extracellular and intracellular Tim-3 expression levels in CD34/CD45 gated blasts from an AL-MDS patient.

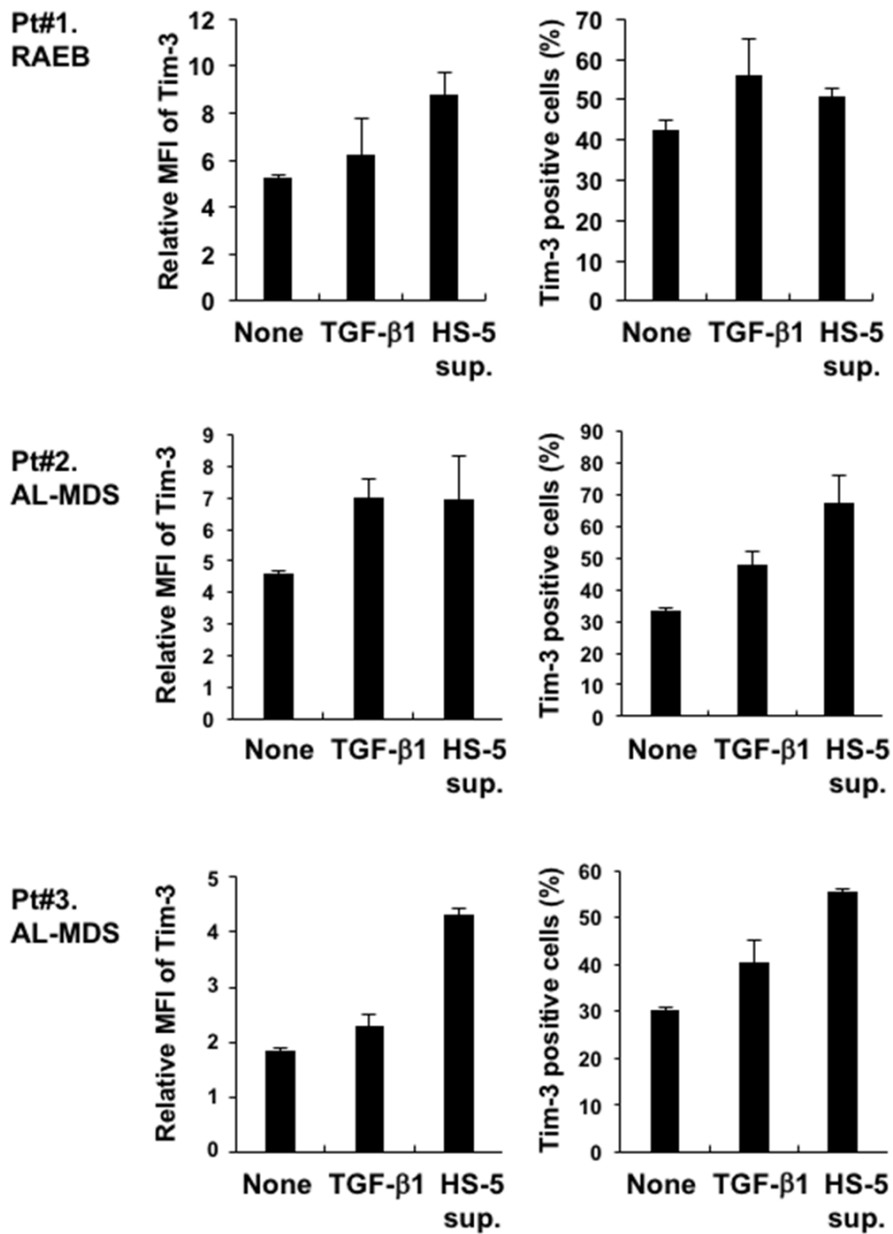

**Supplementary Figure 2: Tim-3 induction on MDS blasts from patients.** Bone marrow mononuclear cells obtained from 3 patients with RAEB and AL-MDS were cultured in the presence of TGF-β or HS-5 sup. for 2 days, and then Tim-3 expression levels on MDS blasts were analyzed by FCM.

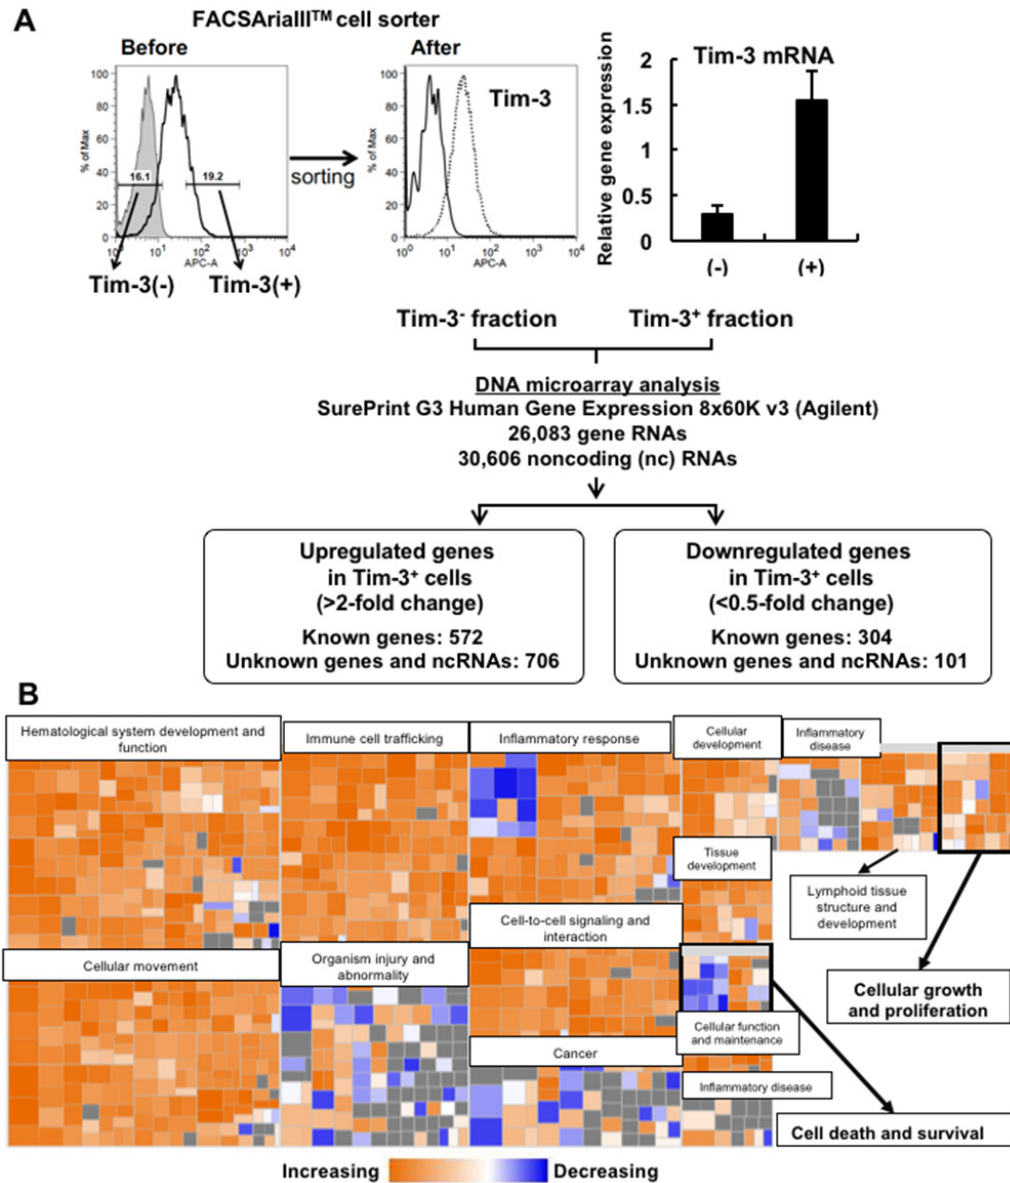

**Supplementary Figure 3: Gene expression of Tim-3<sup>+</sup> MDS blasts.** After sorting, surface Tim-3 expression and Tim-3 mRNA were analyzed in the Tim-3<sup>+</sup> fraction (histogram; dotted line) and Tim-3<sup>-</sup> fraction (solid line) by FCM and real-time PCR, respectively (A). Then DNA microarray analysis was performed (B).

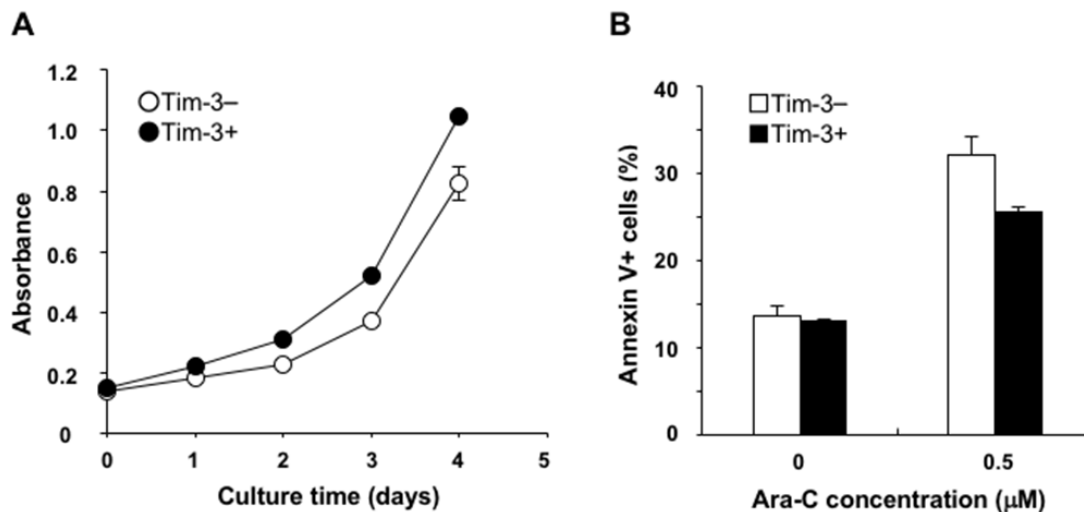

**Supplementary Figure 4: Proliferative potential and drug resistance of Tim-3<sup>+</sup> MDS cells.** Tim-3<sup>+</sup> and Tim-3<sup>-</sup> F-36P cells were isolated with an FACSARIAIII cell sorter and cultured in the presence of galectin-9. **(A)** Cell proliferation was determined in the WST-8 assay using the Cell Counting Kit-8 (CCK-8; Dojindo, Kumamoto, Japan) on days 0–4 of culture. **(B)** Annexin V<sup>+</sup> apoptotic cells in cell fractions induced by cytarabine (Ara-C) were determined by FCM.

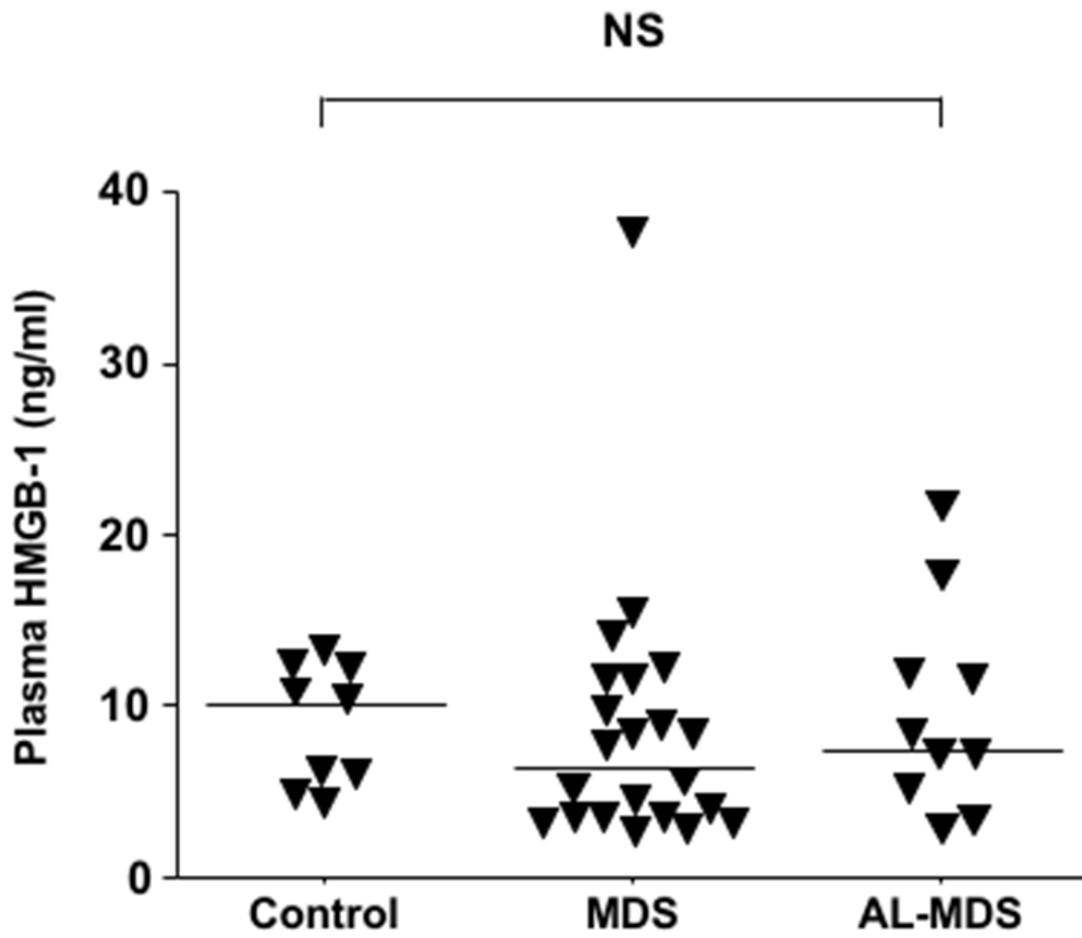

Supplementary Figure 5: Plasma HMGB-1 levels in patients with MDS/AL-MDS. HMGB-1 concentrations in plasma from 9 healthy controls, 22 MDS patients, and 10 AL-MDS patients.

Supplementary Table 1: Primer sequences

| Accession no. | Gene symbol            | Gene title                                  | Primer sequence (5'-3') |                           |
|---------------|------------------------|---------------------------------------------|-------------------------|---------------------------|
|               |                        |                                             | forward (upper)         | reverse (lower)           |
| NM_001101.3   | ACTB ( $\beta$ -actin) | Actin beta                                  | TGGCACCCAGCACAATGAA     | CTAAGTCATAGTCCGCCTAGAAGCA |
| NM_032782.4   | HAVCR2 (Tim-3)         | Human hepatitis A virus cellular receptor 2 | ATTTCCGCAAAGGAGATGTG    | ACCTTGGCTGGTTTGATGAC      |
| NM_002308.3   | LGALS-9 (galectin-9)   | Galectin 9                                  | AAGATGGAGGGTACGTGGTG    | ATCCCGTTCACCATCACCTT      |
| NM_001008540  | CXCR4                  | C-X-C motif chemokine receptor 4            | CTGGCCTTCATCAGTCTGGA    | TCATCTGCCTCACTGACGTT      |
| NM_001206866  | IL6R                   | Interleukin-6 receptor                      | GTGCCAGTATTCCCAGGAGT    | CAGGCTGCAAGATTCCACAA      |
| NM_000584     | CXCL8                  | C-X-C motif chemokine ligand 8              | CAGTTTTGCCAAGGAGTGCT    | CCAGTTTTCCTTGGGGTCCA      |
| NM_002982     | CCL2                   | C-C motif chemokine ligand 2                | GCAGCAAGTGTCCCAAAGAA    | TCGGAGTTTGGGTTTGCTTG      |
| NM_004626     | WNT11                  | Wnt family member 11                        | AGCTCAACCTGACTTCTGCAT   | CACATAAGGTCGCAGCTGTC      |
| NM_000417     | IL2RA                  | Interleukin-2 receptor subunit alpha        | CAAAGTCCAATGCAGCCAGT    | ATAAACCATCTGCCCCACCA      |
